# Supplementary material for: Long Noncoding RNA LINC01116 Contributes to Gefitinib Resistance in Non-small Cell Lung Cancer through Regulating IFI44
Source: PubMed Central journal article supplement — Mol Ther Nucleic Acids. 2019 Nov 14;19:218–27. doi: 10.1016/j.omtn.2019.10.039 (PMC6920314; doi:10.1016/j.omtn.2019.10.039), 2019-11-14

OMTN, Volume 19

## **Supplemental Information**

### **Long Noncoding RNA LINC01116 Contributes to Gefitinib Resistance in Non-small Cell Lung Cancer through Regulating IFI44**

**He Wang, Binbin Lu, Shengnan Ren, Fubin Wu, Xinxing Wang, Caiyun Yan, and Zhaoxia Wang**

**Table S1. Primer and siRNA sequence**

**qPCR primers**

|             |                         |
|-------------|-------------------------|
| GAPDH F     | GGGAGCCAAAAGGGTCAT      |
| GAPDH R     | GAGTCCTTCCACGATACCAA    |
| LINC01116 F | CGCTTTGCTGAAGACGAGC     |
| LINC01116 R | ATATTGAACTGAGCGGGGCT    |
| IFI44 F     | ATGGCAGTGACAACCTCGTTTG  |
| IFI44 R     | TCCTGGTAACTCTCTTCTGCATA |
| IFIT1 F     | GCGCTGGGTATGCGATCTC     |
| IFIT1 R     | CAGCCTGCCTTAGGGGAAG     |
| MX1 F       | GGTGGTCCCCAGTAATGTGG    |
| MX1 R       | CGTCAAGATTCCGATGGTCCT   |
| IRF9 F      | GCCCTACAAGGTGTATCAGTTG  |
| IRF9 R      | TGCTGTCGCTTTGATGGTACT   |
| ATG9B F     | CCCCTCATAACAAGAAGCTCCC  |
| ATG9B R     | TGCAGGTTGAGCCTGTGTTG    |
| NOS3 F      | TGATGGCGAAGCGAGTGAAG    |
| NOS3 R      | ACTCATCCATACACAGGACCC   |
| MYL9 F      | TCTTCGCAATGTTTGACCAGT   |
| MYL9 R      | GTTGAAAGCCTCCTTAAACTCCT |

**siRNA sequence**

|              |                           |
|--------------|---------------------------|
| LINC01116 1# | CCGCUCAGUUCAAUUUUCAAGUGA  |
| LINC01116 2# | AGAAGACAACUGAAUUGCUUCUAAG |
| si-IFI44     | UAUACUUCUCAGAUAUCCC       |

**Figure S1. T790M mutation analysis of PC9 and PC9/R cells.**

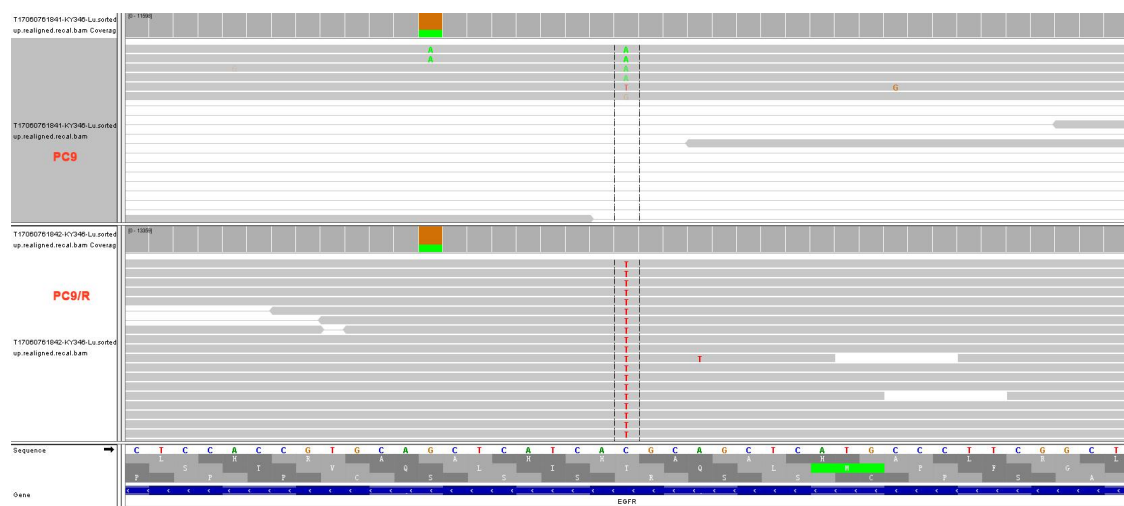

Supplement: mmc1.pdf [file mmc1.pdf]
